# Supplementary material for: Tea Plantation Intercropping Legume Improves Soil Ecosystem Multifunctionality and Tea Quality by Regulating Rare Bacterial Taxa
Source: MDPI journal article supplement (doi:10.3390/agronomy13041110), 2023-04-13
Supplement: s1 [file s1]

Archive with 1 entries (1 files):
- agronomy-2286338-supplementary.pdf
